# Supplementary material for: Uncertainty Analysis of Mobile Phone Use and Its Effect on Cognitive Function: The Application of Monte Carlo Simulation in a Cohort of Australian Primary School Children
Source: MDPI journal article supplement (doi:10.3390/ijerph16132428), 2019-07-08
Supplement: s1 [file s1]

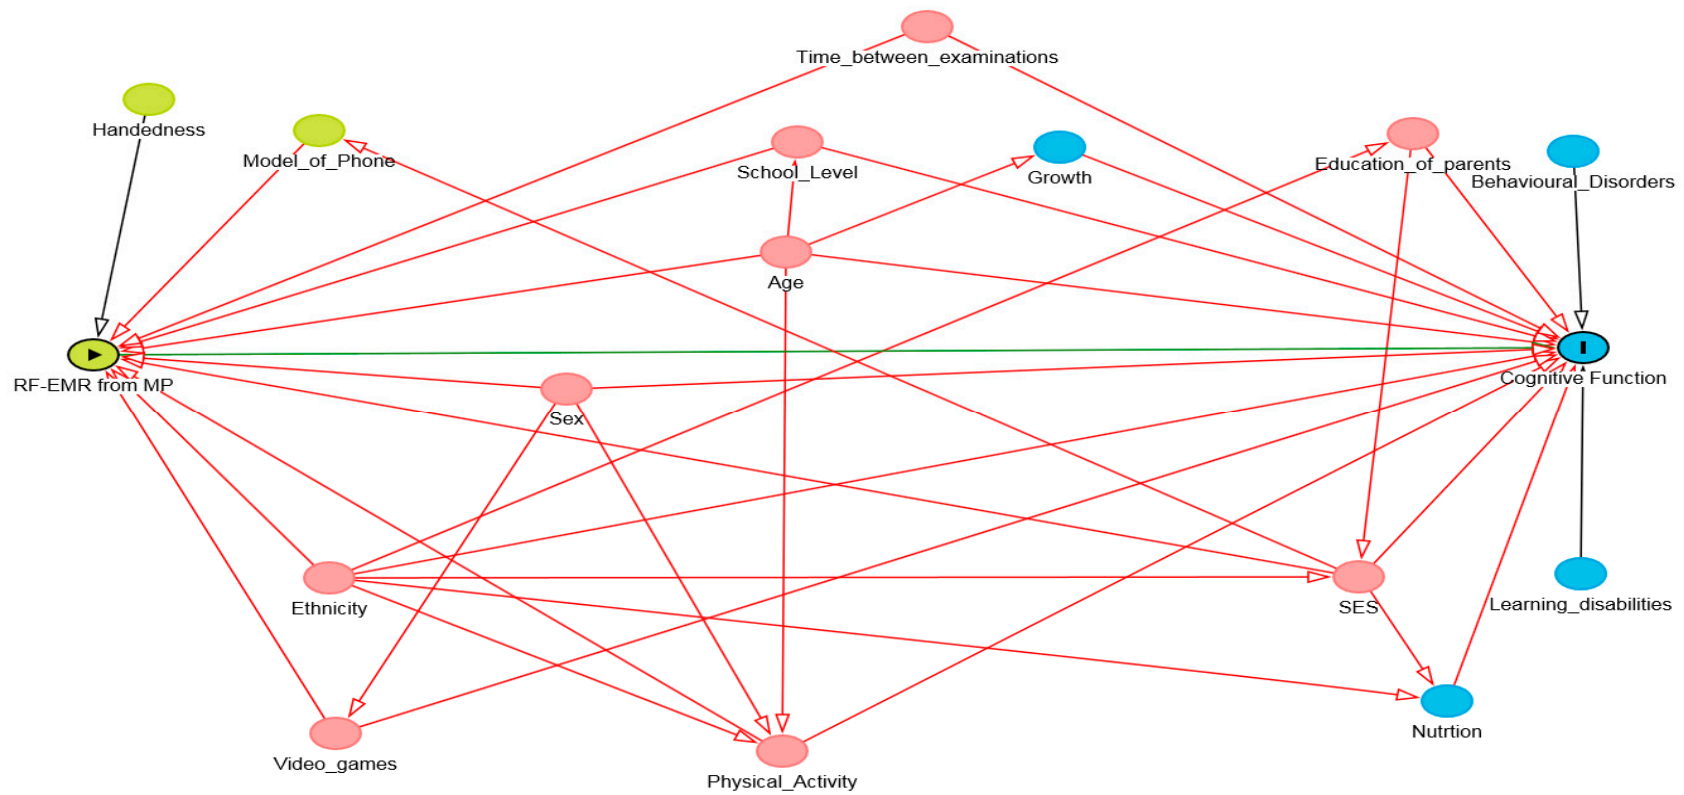

Supplementary Figure S1. Directed acyclic graph used to determine covariate structure. Copied with permission of authors from Brzozek et al. [12]
